# Supplementary material for: Potassium Recovery from Potassium Solution and Seawater Using Different Adsorbents
Source: MDPI journal article supplement (doi:10.3390/app11188660), 2021-09-17
Supplement: s1 [file s1]

Archive with 1 entries (1 files):
- applsci-1361387-supplementary.pdf
