# Supplementary material for: Potassium Recovery from Potassium Solution and Seawater Using Different Adsorbents
Source: MDPI journal article supplement (doi:10.3390/app11188660), 2021-09-17
Supplement: s1 [file s1 › applsci-1361387-supplementary.pdf]

## **Supplementary Material**

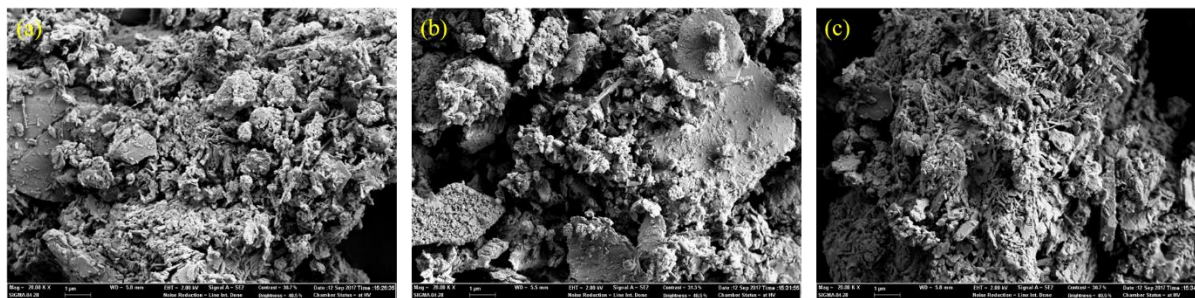

**Figure S1. SEM images of three adsorbents used in this study. (a) natural zeolite, (b) ammonium acetate-treated zeolite, and (c) manganese nodule.**
